# Supplementary material for: XRP44X, an Inhibitor of Ras/Erk Activation of the Transcription Factor Elk3, Inhibits Tumour Growth and Metastasis in Mice
Source: PubMed Central journal article supplement (PMC4948895; doi:10.1371/journal.pone.0159531), 2016-07-18

A C6

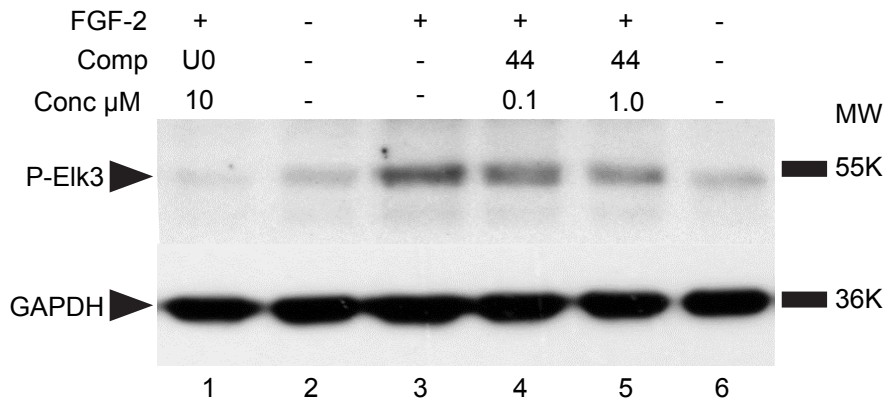

B LL/2 (LLC1)

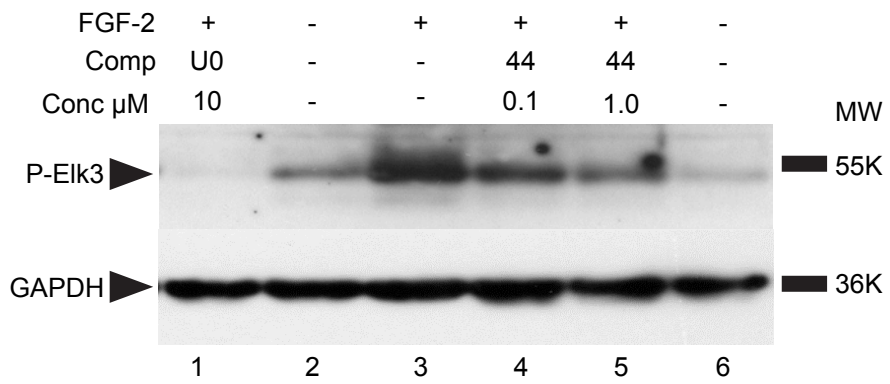

Supplement: pone.0159531.s001.pdf [file pone.0159531.s001.pdf]
