# Supplementary material for: XRP44X, an Inhibitor of Ras/Erk Activation of the Transcription Factor Elk3, Inhibits Tumour Growth and Metastasis in Mice
Source: PubMed Central journal article supplement (PMC4948895; doi:10.1371/journal.pone.0159531), 2016-07-18

A

| GENE SET NAME                             | ES    | NES   | NOM p-val | FDR q-val | FWER p-val |
|-------------------------------------------|-------|-------|-----------|-----------|------------|
| SCGGAAGY_V\$ELK1_02                       | -0.37 | -1.57 | 0.029     | 0.048     | 0.012      |
| GGGTGRR_V\$PAX4_03                        | 0.40  | 1.43  | 0.040     | 0.84      | 0.60       |
| KOKKINAKIS_METHIONINE_DEPRIVATION_48HR_UP | -0.36 | -1.57 | 0.019     | 0.22      | 0.09       |
| ENK_UV_RESPONSE_KERATINOCYTE_UP           | 0.50  | 1.65  | 0.004     | 0.77      | 0.54       |

B

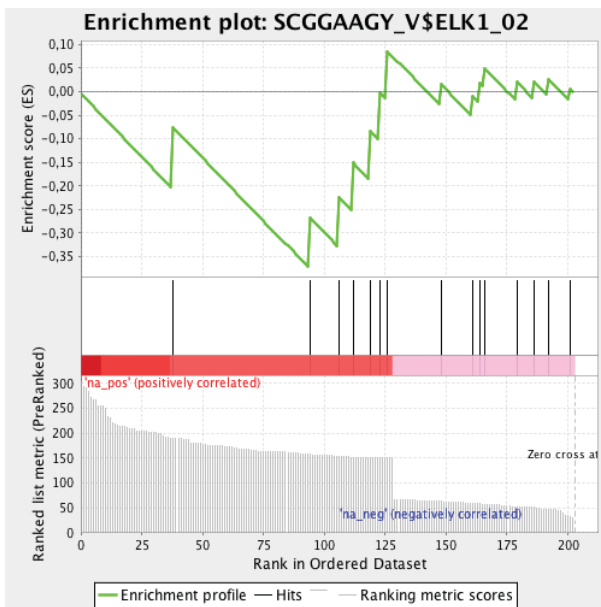

D

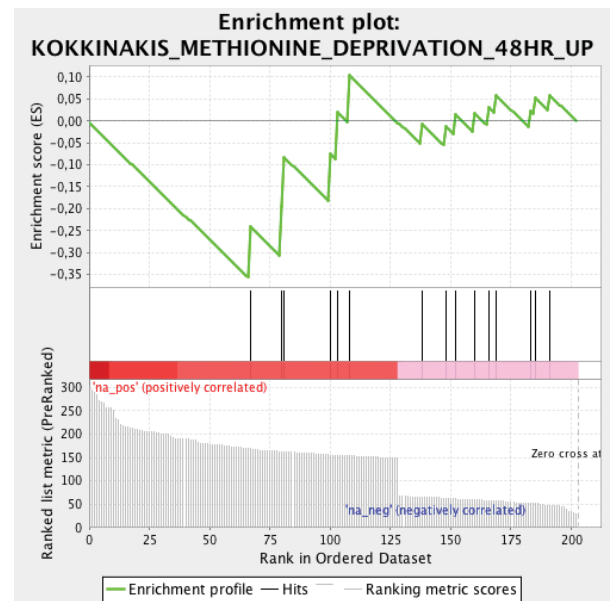

C

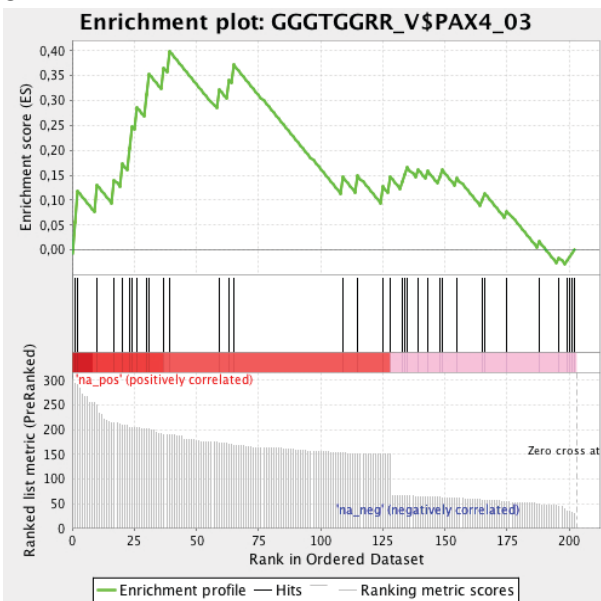

E

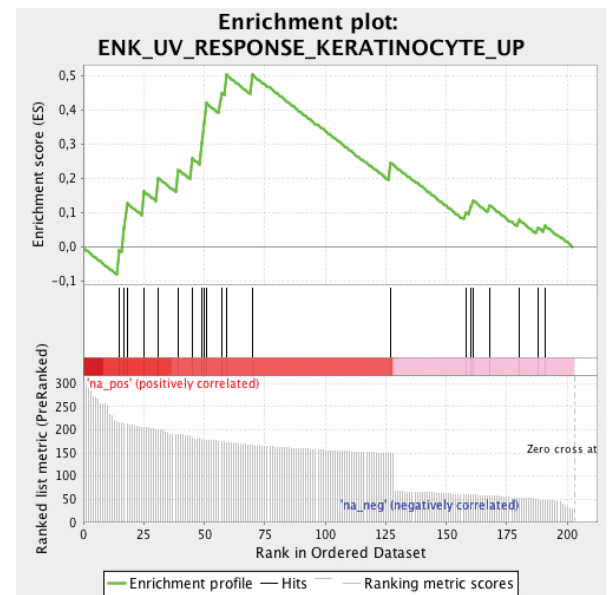

Supplement: pone.0159531.s002.pdf [file pone.0159531.s002.pdf]
