# Supplementary material for: XRP44X, an Inhibitor of Ras/Erk Activation of the Transcription Factor Elk3, Inhibits Tumour Growth and Metastasis in Mice
Source: PubMed Central journal article supplement (PMC4948895; doi:10.1371/journal.pone.0159531), 2016-07-18

### Major organs relative weight

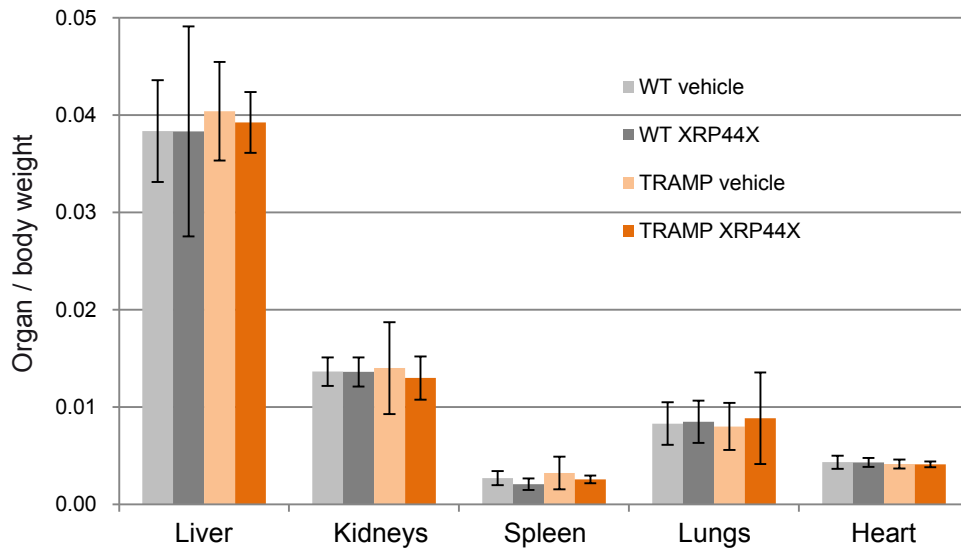

Supplement: pone.0159531.s006.pdf [file pone.0159531.s006.pdf]
