# Supplementary material for: XRP44X, an Inhibitor of Ras/Erk Activation of the Transcription Factor Elk3, Inhibits Tumour Growth and Metastasis in Mice
Source: PubMed Central journal article supplement (PMC4948895; doi:10.1371/journal.pone.0159531), 2016-07-18
Supplement: pone.0159531.s008.pdf [file pone.0159531.s008.pdf]

**S1 Table.** Expression changes of cancer related genes in tumours from LL/2 xenografted animals treated with XRP44X for 18 days and C6 xenografted animals treated with XRP44X for 26 days compared to corresponding control tumours, using cancer gene arrays.

|    | FOLD | ENTREZ ID | NAME     | DESCRIPTION                                                                               |
|----|------|-----------|----------|-------------------------------------------------------------------------------------------|
| 1  | 3.01 | 5788      | PTPRC    | protein tyrosine phosphatase, receptor type, C                                            |
| 2  | 2.93 | 3339      | HSPG2    | heparan sulfate proteoglycan 2                                                            |
| 3  | 2.90 | 5331      | PLCB3    | phospholipase C, beta 3 (phosphatidylinositol-specific)                                   |
| 4  | 2.83 | 6708      | SPTA1    | spectrin, alpha, erythrocytic 1 (elliptocytosis 2)                                        |
| 5  | 2.72 | 5793      | PTPRG    | protein tyrosine phosphatase, receptor type, G                                            |
| 6  | 2.68 | 3717      | JAK2     | Janus kinase 2                                                                            |
| 7  | 2.66 | 7479      | WNT8B    | wingless-type MMTV integration site family, member 8B                                     |
| 8  | 2.56 | 5789      | PTPRD    | protein tyrosine phosphatase, receptor type, D                                            |
| 9  | 2.55 | 6097      | RORC     | RAR-related orphan receptor C                                                             |
| 10 | 2.55 | 3627      | CXCL10   | chemokine (C-X-C motif) ligand 10                                                         |
| 11 | 2.50 | 8878      | SQSTM1   | sequestosome 1                                                                            |
| 12 | 2.32 | 345611    | IRGM     | immunity-related GTPase family, M                                                         |
| 13 | 2.30 | 59269     | HIVEP3   | human immunodeficiency virus type I enhancer binding protein 3                            |
| 14 | 2.20 | 8495      | PPFIBP2  | PTPRF interacting protein, binding protein 2 (liprin beta 2)                              |
| 15 | 2.18 | 4055      | LTBR     | lymphotoxin beta receptor (TNFR superfamily, member 3)                                    |
| 16 | 2.15 | 5696      | PSMB8    | proteasome (prosome, macropain) subunit, beta type, 8 (large multifunctional peptidase 7) |
| 17 | 2.14 | 5599      | MAPK8    | mitogen-activated protein kinase 8                                                        |
| 18 | 2.13 | 2783      | GNB2     | guanine nucleotide binding protein (G protein), beta polypeptide 2                        |
| 19 | 2.13 | 4061      | LY6E     | lymphocyte antigen 6 complex, locus E                                                     |
| 20 | 2.11 | 12        | SERPINA3 | serpin peptidase inhibitor, clade A (alpha-1 antiproteinase, antitrypsin), member 3       |
| 21 | 2.10 | 4633      | MYL2     | myosin, light chain 2, regulatory, cardiac, slow                                          |
| 22 | 2.08 | 10693     | CCT6B    | chaperonin containing TCP1, subunit 6B (zeta 2)                                           |
| 23 | 2.08 | 1114      | CHGB     | chromogranin B (secretogranin 1)                                                          |
| 24 | 2.05 | 558       | AXL      | AXL receptor tyrosine kinase                                                              |
| 25 | 2.05 | 655       | BMP7     | bone morphogenetic protein 7                                                              |
| 26 | 2.05 | 6354      | CCL7     | chemokine (C-C motif) ligand 7                                                            |
| 27 | 2.04 | 3561      | IL2RG    | interleukin 2 receptor, gamma                                                             |
| 28 | 2.04 | 56890     | MDM1     | Mdm1 nuclear protein homolog (mouse)                                                      |
| 29 | 2.02 | 5465      | PPARA    | peroxisome proliferator-activated receptor alpha                                          |
| 30 | 2.02 | 10728     | PTGES3   | prostaglandin E synthase 3 (cytosolic)                                                    |
| 31 | 2.01 | 397       | ARHGDI3  | Rho GDP dissociation inhibitor (GDI) beta                                                 |
| 32 | 2.01 | 1839      | HBEGF    | heparin-binding EGF-like growth factor                                                    |
| 33 | 1.99 | 4831      | NME2     | non-metastatic cells 2, protein (NM23B) expressed in                                      |
| 34 | 1.99 | 6375      | XCL1     | chemokine (C motif) ligand 1                                                              |
| 35 | 1.94 | 7402      | UTRN     | utrophin                                                                                  |
| 36 | 1.93 | 998       | CDC42    | cell division cycle 42 (GTP binding protein, 25kDa)                                       |
| 37 | 1.91 | 6423      | SFRP2    | secreted frizzled-related protein 2                                                       |
| 38 | 1.90 | 1398      | CRK      | v-crk sarcoma virus CT10 oncogene homolog (avian)                                         |

|    |      |        |         |                                                                                |
|----|------|--------|---------|--------------------------------------------------------------------------------|
| 39 | 1.90 | 3308   | HSPA4   | heat shock 70kDa protein 4                                                     |
| 40 | 1.90 | 3695   | ITGB7   | integrin, beta 7                                                               |
| 41 | 1.90 | 4043   | LRPAP1  | low density lipoprotein receptor-related protein associated protein 1          |
| 42 | 1.89 | 3684   | ITGAM   | integrin, alpha M (complement component 3 receptor 3 subunit)                  |
| 43 | 1.87 | 1591   | CYP24A1 | cytochrome P450, family 24, subfamily A, polypeptide 1                         |
| 44 | 1.87 | 2681   | GGTA1P  | glycoprotein, alpha-galactosyltransferase 1 pseudogene                         |
| 45 | 1.87 | 4683   | NBN     | nibrin                                                                         |
| 46 | 1.81 | 7040   | TGFB1   | transforming growth factor, beta 1                                             |
| 47 | 1.80 | 22948  | CCT5    | chaperonin containing TCP1, subunit 5 (epsilon)                                |
| 48 | 1.80 | 908    | CCT6A   | chaperonin containing TCP1, subunit 6A (zeta 1)                                |
| 49 | 1.80 | 1002   | CDH4    | cadherin 4, type 1, R-cadherin (retinal)                                       |
| 50 | 1.80 | 2919   | CXCL1   | chemokine (C-X-C motif) ligand 1 (melanoma growth stimulating activity, alpha) |
| 51 | 1.77 | 1586   | CYP17A1 | cytochrome P450, family 17, subfamily A, polypeptide 1                         |
| 52 | 1.77 | 2707   | GJB3    | gap junction protein, beta 3, 31kDa                                            |
| 53 | 1.76 | 71     | ACTG1   | actin, gamma 1                                                                 |
| 54 | 1.76 | 6347   | CCL2    | chemokine (C-C motif) ligand 2                                                 |
| 55 | 1.76 | 1300   | COL10A1 | collagen, type X, alpha 1                                                      |
| 56 | 1.76 | 3305   | HSPA1L  | heat shock 70kDa protein 1-like                                                |
| 57 | 1.74 | 2037   | EPB41L2 | erythrocyte membrane protein band 4.1-like 2                                   |
| 58 | 1.74 | 6404   | SELPLG  | selectin P ligand                                                              |
| 59 | 1.74 | 7114   | TMSB4X  | thymosin beta 4, X-linked                                                      |
| 60 | 1.73 | 1947   | EFNB1   | ephrin-B1                                                                      |
| 61 | 1.73 | 3460   | IFNGR2  | interferon gamma receptor 2 (interferon gamma transducer 1)                    |
| 62 | 1.72 | 8728   | ADAM19  | ADAM metalloproteinase domain 19                                               |
| 63 | 1.72 | 4851   | NOTCH1  | notch 1                                                                        |
| 64 | 1.71 | 3673   | ITGA2   | integrin, alpha 2 (CD49B, alpha 2 subunit of VLA-2 receptor)                   |
| 65 | 1.70 | 2494   | NR5A2   | nuclear receptor subfamily 5, group A, member 2                                |
| 66 | 1.69 | 890    | CCNA2   | cyclin A2                                                                      |
| 67 | 1.69 | 3002   | GZMB    | granzyme B (granzyme 2, cytotoxic T-lymphocyte-associated serine esterase 1)   |
| 68 | 1.69 | 3486   | IGFBP3  | insulin-like growth factor binding protein 3                                   |
| 69 | 1.68 | 4288   | MKI67   | antigen identified by monoclonal antibody Ki-67                                |
| 70 | 1.67 | 1829   | DSG2    | desmoglein 2                                                                   |
| 71 | 1.66 | 1588   | CYP19A1 | cytochrome P450, family 19, subfamily A, polypeptide 1                         |
| 72 | 1.65 | 2953   | GSTT2   | glutathione S-transferase theta 2                                              |
| 73 | 1.65 | 3581   | IL9R    | interleukin 9 receptor                                                         |
| 74 | 1.64 | 2683   | B4GALT1 | UDP-Gal:betaGlcNAc beta 1,4- galactosyltransferase, polypeptide 1              |
| 75 | 1.64 | 10694  | CCT8    | chaperonin containing TCP1, subunit 8 (theta)                                  |
| 76 | 1.63 | 654    | BMP6    | bone morphogenetic protein 6                                                   |
| 77 | 1.63 | 284541 | CYP4A22 | cytochrome P450, family 4, subfamily A, polypeptide 22                         |
| 78 | 1.63 | 6996   | TDG     | thymine-DNA glycosylase                                                        |
| 79 | 1.63 | 331    | XIAP    | X-linked inhibitor of apoptosis                                                |
| 80 | 1.62 | 4299   | AFF1    | AF4/FMR2 family, member 1                                                      |
| 81 | 1.62 | 317    | APAF1   | apoptotic peptidase activating factor 1                                        |
| 82 | 1.62 | 330    | BIRC3   | baculoviral IAP repeat containing 3                                            |

|     |      |        |          |                                                                                |
|-----|------|--------|----------|--------------------------------------------------------------------------------|
| 83  | 1.62 | 8851   | CDK5R1   | cyclin-dependent kinase 5, regulatory subunit 1 (p35)                          |
| 84  | 1.62 | 1466   | CSRP2    | cysteine and glycine-rich protein 2                                            |
| 85  | 1.62 | 5602   | MAPK10   | mitogen-activated protein kinase 10                                            |
| 86  | 1.61 | 22925  | PLA2R1   | phospholipase A2 receptor 1, 180kDa                                            |
| 87  | 1.60 | 1238   | CCBP2    | chemokine binding protein 2                                                    |
| 88  | 1.60 | 8738   | CRADD    | CASP2 and RIPK1 domain containing adaptor with death domain                    |
| 89  | 1.60 | 1396   | CRIP1    | cysteine-rich protein 1 (intestinal)                                           |
| 90  | 1.60 | 8323   | FZD6     | frizzled family receptor 6                                                     |
| 91  | 1.59 | 6351   | CCL4     | chemokine (C-C motif) ligand 4                                                 |
| 92  | 1.59 | 1944   | EFNA3    | ephrin-A3                                                                      |
| 93  | 1.59 | 142    | PARP1    | poly (ADP-ribose) polymerase 1                                                 |
| 94  | 1.58 | 1572   | CYP2F1   | cytochrome P450, family 2, subfamily F, polypeptide 1                          |
| 95  | 1.57 | 3316   | HSPB2    | heat shock 27kDa protein 2                                                     |
| 96  | 1.56 | 4363   | ABCC1    | ATP-binding cassette, sub-family C (CFTR/MRP), member 1                        |
| 97  | 1.56 | 4485   | MST1     | macrophage stimulating 1 (hepatocyte growth factor-like)                       |
| 98  | 1.56 | 4830   | NME1     | non-metastatic cells 1, protein (NM23A) expressed in                           |
| 99  | 1.56 | 8737   | RIPK1    | receptor (TNFRSF)-interacting serine-threonine kinase 1                        |
| 100 | 1.56 | 4735   | SEPT2    | septin 2                                                                       |
| 101 | 1.55 | 993    | CDC25A   | cell division cycle 25 homolog A (S. pombe)                                    |
| 102 | 1.55 | 3001   | GZMA     | granzyme A (granzyme 1, cytotoxic T-lymphocyte-associated serine esterase 3)   |
| 103 | 1.55 | 3265   | HRAS     | v-Ha-ras Harvey rat sarcoma viral oncogene homolog                             |
| 104 | 1.55 | 3320   | HSP90AA1 | heat shock protein 90kDa alpha (cytosolic), class A member 1                   |
| 105 | 1.54 | 91     | ACVR1B   | activin A receptor, type IB                                                    |
| 106 | 1.54 | 1236   | CCR7     | chemokine (C-C motif) receptor 7                                               |
| 107 | 1.54 | 643    | CXCR5    | chemokine (C-X-C motif) receptor 5                                             |
| 108 | 1.54 | 140885 | SIRPA    | signal-regulatory protein alpha                                                |
| 109 | 1.53 | 2697   | GJA1     | gap junction protein, alpha 1, 43kDa                                           |
| 110 | 1.53 | 27040  | LAT      | linker for activation of T cells                                               |
| 111 | 1.53 | 5813   | PURA     | purine-rich element binding protein A                                          |
| 112 | 1.52 | 1544   | CYP1A2   | cytochrome P450, family 1, subfamily A, polypeptide 2                          |
| 113 | 1.52 | 22919  | MAPRE1   | microtubule-associated protein, RP/EB family, member 1                         |
| 114 | 1.52 | 6767   | ST13     | suppression of tumorigenicity 13 (colon carcinoma) (Hsp70 interacting protein) |
| 115 | 1.51 | 595    | CCND1    | cyclin D1                                                                      |
| 116 | 1.51 | 2242   | FES      | feline sarcoma oncogene                                                        |
| 117 | 1.51 | 2247   | FGF2     | fibroblast growth factor 2 (basic)                                             |
| 118 | 1.51 | 2814   | GP5      | glycoprotein V (platelet)                                                      |
| 119 | 1.51 | 51155  | HN1      | hematological and neurological expressed 1                                     |
| 120 | 1.51 | 4893   | NRAS     | neuroblastoma RAS viral (v-ras) oncogene homolog                               |
| 121 | 1.51 | 7058   | THBS2    | thrombospondin 2                                                               |
| 122 | 1.50 | 10575  | CCT4     | chaperonin containing TCP1, subunit 4 (delta)                                  |
| 123 | 1.50 | 2328   | FMO3     | flavin containing monooxygenase 3                                              |
| 124 | 1.50 | 10808  | HSPH1    | heat shock 105kDa/110kDa protein 1                                             |
| 125 | 1.50 | 3640   | INSL3    | insulin-like 3 (Leydig cell)                                                   |
| 126 | 1.50 | 3976   | LIF      | leukemia inhibitory factor (cholinergic differentiation factor)                |

|     |      |       |          |                                                                                         |
|-----|------|-------|----------|-----------------------------------------------------------------------------------------|
| 127 | 1.50 | 4763  | NF1      | neurofibromin 1                                                                         |
| 128 | 1.50 | 5269  | SERPINB6 | serpin peptidase inhibitor, clade B (ovalbumin), member 6                               |
| 129 | 1.50 | 8651  | SOCS1    | suppressor of cytokine signaling 1                                                      |
| 1   | 0.67 | 116   | ADCYAP1  | adenylate cyclase activating polypeptide 1 (pituitary)                                  |
| 2   | 0.67 | 1571  | CYP2E1   | cytochrome P450, family 2, subfamily E, polypeptide 1                                   |
| 3   | 0.67 | 2335  | FN1      | fibronectin 1                                                                           |
| 4   | 0.67 | 3702  | ITK      | IL2-inducible T-cell kinase                                                             |
| 5   | 0.66 | 3913  | LAMB2    | laminin, beta 2 (laminin 5)                                                             |
| 6   | 0.66 | 176   | ACAN     | aggrecan                                                                                |
| 7   | 0.66 | 2260  | FGFR1    | fibroblast growth factor receptor 1                                                     |
| 8   | 0.66 | 6383  | SDC2     | syndecan 2                                                                              |
| 9   | 0.66 | 5447  | POR      | P450 (cytochrome) oxidoreductase                                                        |
| 10  | 0.65 | 7042  | TGFB2    | transforming growth factor, beta 2                                                      |
| 11  | 0.65 | 9181  | ARHGEF2  | Rho/Rac guanine nucleotide exchange factor (GEF) 2                                      |
| 12  | 0.65 | 919   | CD247    | CD247 molecule                                                                          |
| 13  | 0.65 | 1943  | EFNA2    | ephrin-A2                                                                               |
| 14  | 0.65 | 9672  | SDC3     | syndecan 3                                                                              |
| 15  | 0.65 | 7067  | THRA     | thyroid hormone receptor, alpha                                                         |
| 16  | 0.65 | 1031  | CDKN2C   | cyclin-dependent kinase inhibitor 2C (p18, inhibits CDK4)                               |
| 17  | 0.64 | 5580  | PRKCD    | protein kinase C, delta                                                                 |
| 18  | 0.63 | 3579  | CXCR2    | chemokine (C-X-C motif) receptor 2                                                      |
| 19  | 0.63 | 10019 | SH2B3    | SH2B adaptor protein 3                                                                  |
| 20  | 0.63 | 7157  | TP53     | tumor protein p53                                                                       |
| 21  | 0.62 | 652   | BMP4     | bone morphogenetic protein 4                                                            |
| 22  | 0.62 | 2322  | FLT3     | fms-related tyrosine kinase 3                                                           |
| 23  | 0.62 | 5295  | PIK3R1   | phosphoinositide-3-kinase, regulatory subunit 1 (alpha)                                 |
| 24  | 0.62 | 388   | RHOB     | ras homolog gene family, member B                                                       |
| 25  | 0.61 | 1857  | DVL3     | dishevelled, dsh homolog 3 (Drosophila)                                                 |
| 26  | 0.61 | 900   | CCNG1    | cyclin G1                                                                               |
| 27  | 0.61 | 2771  | GNAI2    | guanine nucleotide binding protein (G protein), alpha inhibiting activity polypeptide 2 |
| 28  | 0.61 | 90990 | KIFC2    | kinesin family member C2                                                                |
| 29  | 0.61 | 1326  | MAP3K8   | mitogen-activated protein kinase kinase kinase 8                                        |
| 30  | 0.60 | 1490  | CTGF     | connective tissue growth factor                                                         |
| 31  | 0.60 | 1000  | CDH2     | cadherin 2, type 1, N-cadherin (neuronal)                                               |
| 32  | 0.60 | 3315  | HSPB1    | heat shock 27kDa protein 1                                                              |
| 33  | 0.59 | 3326  | HSP90AB1 | heat shock protein 90kDa alpha (cytosolic), class B member 1                            |
| 34  | 0.59 | 2213  | FCGR2B   | Fc fragment of IgG, low affinity IIb, receptor (CD32)                                   |
| 35  | 0.59 | 3603  | IL16     | interleukin 16                                                                          |
| 36  | 0.58 | 598   | BCL2L1   | BCL2-like 1                                                                             |
| 37  | 0.57 | 2534  | FYN      | FYN oncogene related to SRC, FGR, YES                                                   |
| 38  | 0.57 | 6464  | SHC1     | SHC (Src homology 2 domain containing) transforming protein 1                           |
| 39  | 0.56 | 102   | ADAM10   | ADAM metallopeptidase domain 10                                                         |
| 40  | 0.56 | 5127  | CDK16    | cyclin-dependent kinase 16                                                              |
| 41  | 0.56 | 3082  | HGF      | hepatocyte growth factor (hepapoietin A; scatter factor)                                |

|    |      |        |        |                                                                                        |
|----|------|--------|--------|----------------------------------------------------------------------------------------|
| 42 | 0.56 | 4157   | MC1R   | melanocortin 1 receptor (alpha melanocyte stimulating hormone receptor)                |
| 43 | 0.56 | 7185   | TRAF1  | TNF receptor-associated factor 1                                                       |
| 44 | 0.56 | 7507   | XPA    | xeroderma pigmentosum, complementation group A                                         |
| 45 | 0.55 | 4916   | NTRK3  | neurotrophic tyrosine kinase, receptor, type 3                                         |
| 46 | 0.55 | 6775   | STAT4  | signal transducer and activator of transcription 4                                     |
| 47 | 0.54 | 4091   | SMAD6  | SMAD family member 6                                                                   |
| 48 | 0.54 | 3963   | LGALS7 | lectin, galactoside-binding, soluble, 7                                                |
| 49 | 0.53 | 623    | BDKRB1 | bradykinin receptor B1                                                                 |
| 50 | 0.53 | 915    | CD3D   | CD3d molecule, delta (CD3-TCR complex)                                                 |
| 51 | 0.53 | 10188  | TNK2   | tyrosine kinase, non-receptor, 2                                                       |
| 52 | 0.53 | 6256   | RXRA   | retinoid X receptor, alpha                                                             |
| 53 | 0.52 | 5900   | RALGDS | ral guanine nucleotide dissociation stimulator                                         |
| 54 | 0.52 | 208    | AKT2   | v-akt murine thymoma viral oncogene homolog 2                                          |
| 55 | 0.51 | 650    | BMP2   | bone morphogenetic protein 2                                                           |
| 56 | 0.51 | 2201   | FBN2   | fibrillin 2                                                                            |
| 57 | 0.51 | 4313   | MMP2   | matrix metalloproteinase 2 (gelatinase A, 72kDa gelatinase, 72kDa type IV collagenase) |
| 58 | 0.51 | 4968   | OGG1   | 8-oxoguanine DNA glycosylase                                                           |
| 59 | 0.49 | 3484   | IGFBP1 | insulin-like growth factor binding protein 1                                           |
| 60 | 0.49 | 9618   | TRAF4  | TNF receptor-associated factor 4                                                       |
| 61 | 0.48 | 7057   | THBS1  | thrombospondin 1                                                                       |
| 62 | 0.48 | 284    | ANGPT1 | angiopoietin 1                                                                         |
| 63 | 0.48 | 834    | CASP1  | caspase 1, apoptosis-related cysteine peptidase (interleukin 1, beta, convertase)      |
| 64 | 0.48 | 1649   | DDIT3  | DNA-damage-inducible transcript 3                                                      |
| 65 | 0.48 | 2249   | FGF4   | fibroblast growth factor 4                                                             |
| 66 | 0.46 | 283120 | H19    | H19, imprinted maternally expressed transcript (non-protein coding)                    |
| 67 | 0.46 | 3055   | HCK    | hemopoietic cell kinase                                                                |
| 68 | 0.44 | 1277   | COL1A1 | collagen, type I, alpha 1                                                              |
| 69 | 0.44 | 6442   | SGCA   | sarcoglycan, alpha (50kDa dystrophin-associated glycoprotein)                          |
| 70 | 0.40 | 4257   | MGST1  | microsomal glutathione S-transferase 1                                                 |
| 71 | 0.35 | 2039   | EPB49  | erythrocyte membrane protein band 4.9 (dematin)                                        |
| 72 | 0.35 | 3479   | IGF1   | insulin-like growth factor 1 (somatomedin C)                                           |
| 73 | 0.33 | 7075   | TIE1   | tyrosine kinase with immunoglobulin-like and EGF-like domains 1                        |
| 74 | 0.30 | 6498   | SKIL   | SKI-like oncogene                                                                      |

Fold = Expression in tumours from XRP44X treated animals divided by control tumours.

## Materials and Methods

Tumours were collected following at days 18 (LLC1) and 26 (C6) from mice that were injected with XRP44X or vehicle alone (controls). Median sized tumours were selected for processing. Portions of the tumours were suspended in 3 ml Trizol<sup>®</sup> (Life Technologies), homogenised with an Ultra-Turrax homogeniser in ice, and total RNA was purified according to the manufacturer's protocol. Total RNA was treated with DNase I (0.1 units/ $\mu$ g RNA) for 30 min at 37°C. RNA degradation was negligible, as determined by the 28/18S ratio following agarose gel electrophoresis. A total of 45  $\mu$ g for each

sample was incubated with biotinylated oligo(dT) and streptavidin-coated magnetic beads (Atlas Pure Total RNA Labeling system). RNA on the beads was converted to <sup>32</sup>P-labeled first-strand cDNA probes with Moloney murine leukemia virus and the appropriate Atlas array gene-specific CDS primer mixtures. Probes were purified by column chromatography (NucleoSpin extraction column; Macherey-Nagel), and specific activity was measured by scintillation counting. The cDNA expression arrays (ATLAS™ Mouse Cancer 1.2 Array and Atlas mouse cDNA expression arrays 588 genes; Clontech) were hybridized for 16 h at 71°C (LLC1) or 62°C (C6) using ExpressHyb (Clontech), washed, and autoradiographed with Kodak Biomax or exposed with Phosphorimager screens and scanned with a Typhoon 8600 (Amersham Biosciences). The array images were processed with Atlas Image 1.5 software (Clontech). Ratios between significant signals for untreated and treated samples were calculated. Ratios were considered to be significant if the changes were equal to or greater than 50% ( $\geq 1.5$  or  $\leq 0.67$ ).
