# Supplementary material for: XRP44X, an Inhibitor of Ras/Erk Activation of the Transcription Factor Elk3, Inhibits Tumour Growth and Metastasis in Mice
Source: PubMed Central journal article supplement (PMC4948895; doi:10.1371/journal.pone.0159531), 2016-07-18
Supplement: pone.0159531.s009.pdf [file pone.0159531.s009.pdf]

**S2 Table.** Effect of XRP44X treatment on pathology grade in the TRAMP prostate cancer mouse model. TRAMP mice were treated for 6 days per week with XRP44X (1 mg/kg) from 15 to 29 weeks of age. Prostates were harvested, sectioned and stained with haematoxylin and eosin. Prostate adenocarcinoma grade was determined as described in Kaplan-Lefko et al. [118] on one prostate tissue slide per mouse that had a representative amount of dorsolateral prostate. (NSA – no significant anomalies, PIN - prostatic intraepithelial neoplasia, WD – well differentiated adenocarcinoma, MD – medium differentiated adenocarcinoma, PD – poorly differentiated adenocarcinoma. P=0.008 between TRAMP groups, Fisher’s exact test).

|                   | WT       |          | TRAMP     |           |
|-------------------|----------|----------|-----------|-----------|
|                   | Vehicle  | XRP44X   | Vehicle   | XRP44X    |
| NSA               | 0        | 1        | 0         | 0         |
| PIN               | 7        | 5        | 0         | 0         |
| WD                | 0        | 0        | 12        | 20        |
| MD                | 0        | 0        | 0         | 0         |
| PD                | 0        | 0        | 9         | 1         |
| <b>TOTAL</b>      | <b>7</b> | <b>6</b> | <b>21</b> | <b>21</b> |
| <i>Metastases</i> | <i>0</i> | <i>0</i> | <i>5</i>  | <i>1</i>  |
