# Supplementary material for: XRP44X, an Inhibitor of Ras/Erk Activation of the Transcription Factor Elk3, Inhibits Tumour Growth and Metastasis in Mice
Source: PubMed Central journal article supplement (PMC4948895; doi:10.1371/journal.pone.0159531), 2016-07-18
Supplement: pone.0159531.s011.pdf [file pone.0159531.s011.pdf]

**S4 Table.** Effect of XRP44X treatment on toxicity-related plasma indicators. TRAMP mice were treated for 6 days per week with XRP44X (1 mg/kg) from 15 to 29 weeks of age. Whole blood was taken by cardiac puncture to separate plasma, which was stored at -20<sup>0</sup>C before the analysis. The animals were not treated 48 hours before the blood sampling. The table shows averages from raw values, their standard deviations and Student's t-test (vehicle n=12, XRP44X n=10, all wild type). Abbreviations: T. bilirubin - total bilirubin, LDH - lactate dehydrogenase, ASAT - aspartate amino transferase, ALAT - alanine amino transferase, st. dev. – standard deviation, T-TEST – Student's t-test.

|               | <b>Albumin</b><br>g/l | <b>T. bilirubin</b><br>µmol/l | <b>LDH</b><br>U/l | <b>ASAT</b><br>U/l | <b>ALAT</b><br>U/l | <b>Creatinine</b><br>µmol/l |
|---------------|-----------------------|-------------------------------|-------------------|--------------------|--------------------|-----------------------------|
| Vehicle       | 30.7                  | 2.8                           | 337.4             | 80.7               | 22.4               | 9.3                         |
| St.dev.       | 2.5                   | 1.0                           | 83.9              | 26.9               | 6.5                | 2.6                         |
| XRP44X        | 32.2                  | 2.3                           | 328.3             | 101.1              | 23.3               | 7.6                         |
| St.dev.       | 1.0                   | 0.2                           | 80.9              | 47.8               | 6.6                | 1.4                         |
| <b>T-TEST</b> | <b>0.09</b>           | <b>0.11</b>                   | <b>0.81</b>       | <b>0.25</b>        | <b>0.75</b>        | <b>0.10</b>                 |
